# Supplementary material
Source: Springer Nature journal article supplement (https://www.springermedizin.de/resource/supplementary/12936_2013_3036_MOESM2_ESM.pdf/9544902)
Supplement: MOESM2 [file 9544902]

# Comparison of Reference Mean with Participants' mean

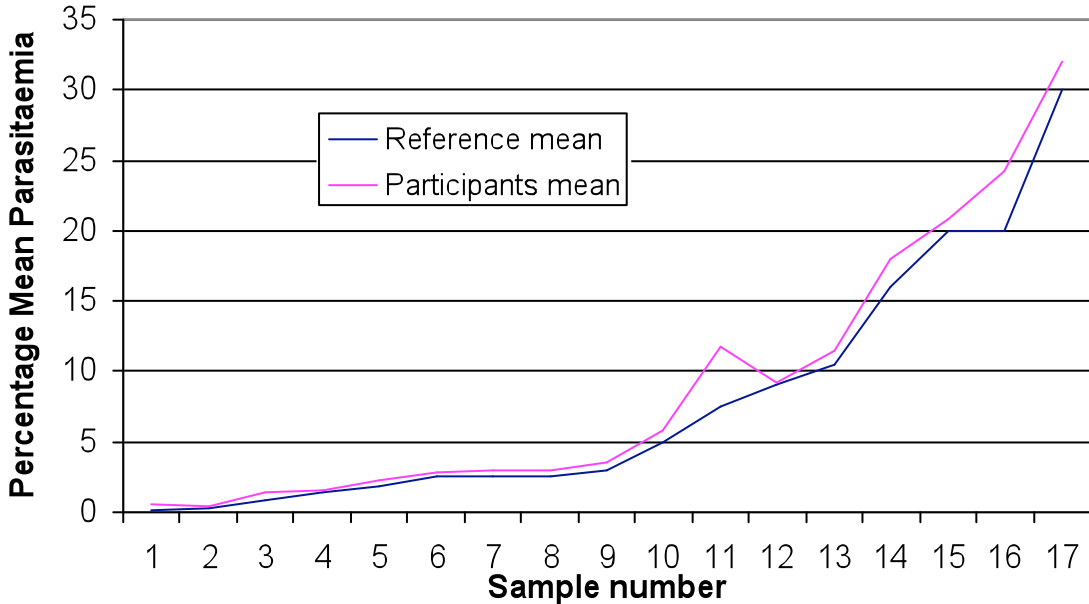

|                            | Reference mean versus Participants mean |
|----------------------------|-----------------------------------------|
| <b>Pearson Correlation</b> | 0.99                                    |
| <b>t stat</b>              | -3.5                                    |
| <b>P(T&lt;=t)</b>          | 0.001                                   |
